# Supplementary material
Source: publisher site journal article supplement (https://www.spandidos-publications.com/7014/downloadSupplementary)
Supplement: Supplementary file 1 [file downloadSupplementary]

## Sheet: Sheet1
Table SVII. PRGs with statistical significance.
id	HR	HR.95L	HR.95H	P-value	km
NLRP1	1.34093	1.12106	1.60393	0.00132458	2.88e-05
GZMB	0.882619	0.817483	0.952945	0.00141196	9.74e-07
CASP6	0.745857	0.618361	0.899642	0.00217161	0.000235069
CASP1	0.863614	0.782584	0.953033	0.00353475	0.00348543
CASP3	0.773259	0.632316	0.945618	0.0122588	0.000232272
IRF1	0.842222	0.725278	0.978021	0.0243632	5.01e-05
CYCS	0.836484	0.702228	0.996409	0.0454712	0.010251
